# Supplementary material
Source: Research Square preprint supplement (doi:10.21203/rs.3.rs-9307919/v1)
Supplement: Supplementary file 1 [file 43f85ff98ca2a91f243fc5fc.docx]

**Supplementary Information**

**Supplementary Materials and Methods**

**Antibodies and reagents**

Rabbit polyclonal antibodies against COX4 (Cat# 11242-1-AP; 1:5000), PGK1 (Cat# 17811-1-AP; 1:5000), PDK1 (Cat# 18262-1-AP; 1:1000), PDHE1α (Cat# 18068-1-AP; 1:5000); recombinant human PGK1 (rPGK1) and recombinant human PDK1 (rPDK1) were procured from Proteintech (Chicago, IL, USA). Mouse monoclonal antibody against β-actin (Cat# T0022; 1:3000) was procured from Affinity Biosciences (Cincinnati, OH, USA). Rabbit polyclonal antibodies against p-PDK1 (Thr338) (Cat# 211596; 1:500) were procured from Signalway (Greenbelt, MA, USA). Rabbit monoclonal antibodies against PDHE1α (Cat# ab168379; 1:1000), p-PDHE1α (S293) (Cat# ab177461; 1:1000); recombinant human PDK1 (rPDK1) and recombinant human PDHE1α (rPDHE1α) were procured from Abcam (Cambridge, MA, USA). Mouse monoclonal antibodies against PDHE1α (Cat# sc-377092; 1:1000) were procured from Santa Cruz Biotechnology (Santa Cruz, CA, USA). Oligomycin, 2-DG and PDHc kinase activator sodium dichloroacetate were procured from MedChemExpress (Monmouth Junction, NJ, USA). Protein A and G magnetic beads, BCA aassay kit, Dynabeads® His-tag isolation kit, and Lipofectamine 2000 were procured from Invitrogen (Grand Island, NY, USA). RNase inhibitors were procured from Beyotime Biotechnology (Beijing, China).

**Plasmids constructions**

Trizol reagent (Invitrogen) was used to isolate the total RNA from the cells, and a FastQuant RT kit (Tiangen, Beijing, China) was used to synthesize complementary DNA (cDNA) in accordance with the manufacturer's instructions. The SNHG15 plasmids were based on the pCDNA3.1-CMV vector backbone (SyngenTech, Beijing, China), while the pCDNA3.1-CMV vector with a C-terminal 3×Flag tag (SyngenTech, Beijing, China) was used to create the plasmids expressing the full-length wild-type PDHE1α and its fragments. All of the constructs were confirmed by Sanger sequencing. The sequences of primers used in plasmid construction are shown in Supplementary Table 1.

To target SNHG15, we employed LncRNA Smart Silencer (RiboBio, Guangzhou, China). Three siRNAs and three ASOs were combined to create the SNHG15 Smart Silencer, while NC Smart Silencer was used as a negative control. Additionally, non-silencing control siRNAs as well as PDK1 and PDHE1α siRNAs were acquired from RiboBio. The target sequences of siRNAs are listed in Supplementary Table 2 and Table 3.

**RNA Isolation and qRT-PCR**

Following the manufacturer's instructions, quantitative RNA analysis was carried out using a QuantStudio 5 System (Thermo Fisher Scientific, Waltham, MA, USA) with the SuperReal SYBR Green PreMix (Tiangen, Beijing, China). The mean Ct for each sample was normalized using 18s rRNA as the reference gene. The primer sequences are listed in Supplementary Table 4.

**iRIP-Seq**

LM3 cells were cross-linked on ice with UV irradiation type C (254 nm). Cells were collected and pelleted at 1,000 g at 4°C, and lysed in cold wash buffer (1× PBS, 0.1% SDS, 0.5% NP-40, and 0.5% sodium deoxycholate) containing 200 U/ml RNase inhibitor (Promega) and protease inhibitor cocktail (Roche) on ice for 10 minutes. For IP, the supernatant was incubated with 15 μg antibodies or control IgG overnight at 4°C. The immunoprecipitates were further incubated with protein A for 3 hours at 4°C. After addition of 1:1,000,000 MNase (300 U/μl; Fermentas), beads were resuspended, incubated in a water bath for 15 minutes at 37°C, and applied to magnet to remove supernatants. The beads were then washed twice in 1 ml of PNK buffer without DTT. RNAs were recovered by acidic phenol/chloroform/isoamyl alcohol extraction (25:24:1, pH 4.0) followed by chloroform extraction. The recovered RNAs were used to generate a paired-end sequencing library with TruSeq small RNA library preparation kit (Illumina) following the manufacturer’s instruction. For high-throughput sequencing, the libraries were applied to Illumina NextSeq 500 system for 150-nt paired-end sequencing by ABLife Inc.

***In Vitro* Transcription**

The primers for antisense SNHG15 containing the T7 promoter sequence (TAATACGACTCACTATAGGG) were purchased from Invitrogen. The primer sequences are listed in Supplementary Table 5. The amplicon was examined via 2% agarose gel electrophoresis, and the DNA extraction kit Ver.4.0 (TaKaRa, Otsu, Japan) was employed to purify the target bands. The MEGAscript Kit (Life Technologies, Carlsbad, CA) and biotin-16-UTP (Epicentre, Madison, WI) were used to generate biotin-labeled SNHG15 and antisense SNHG15 via *in vitro* transcription. As recommended by the manufacturer, the produced RNAs was purified using the Invitrogen MEGAclear Kit (Life Technologies, Carlsbad, CA). Finally, the size and integrity of the produced RNAs were evaluated using 2% agarose gel electrophoresis.

**Western Blot Analysis**

Proteins were transferred to the Immobilon-P membrane (0.2 µm pore size, Millipore, Billerica, MA, USA). The membranes were then incubated with the primary antibodies overnight at 4°C. Following incubation with the secondary antibody coupled with horseradish peroxidase, the blots were then produced using an enhanced chemiluminescence equipment (BD Biosciences, San Jose, CA, USA). ImageJ was used to densitometrically quantify the band intensities.

**Measurements of Glucose Uptake, Lactate Production, ATP and Acetyl-CoA**

Thefluorescent 2-DG analog 2-NBDG was used to measure glucose uptake. The cells were incubated with 2-NBDG (10 μM) for 1 h, washed twice by PBS, and analyzed by flow cytometry (BD Biosciences, Franklin Lakes, NJ). For assessment of lactate production, the cells were resuspended in DMEM without pyruvate, plated in 96-well plates (8×104/ well), and allowed to grow for 6 h. The cell media was collected and diluted 1:6 in lactate assay buffer. The amount of lactate in the media was then measured using the lactate colorimetric assay kit (Abcam) according to the manufacturer’s instructions. The amount of lactate in the sample was calculated by subtracting the amount of lactate in the media. ATP assay kit was from Beyotime and the assay was performed according to manufacturer’s instruction. After centrifugation to remove cell debris, the supernatant was added to the substrate solution. The luminescence was recorded in an Illuminometer with an integration time of 10 s per well. For the measurement of acetyl-CoA, 2×106 cells were lysed with 500 μL assay buffer and centrifuged for 15 min at 10,000 g. Then, the supernatants were deproteinized by adding 2 μL of 1 N perchloric acid/mg protein, and the resulting supernatant was neutralized by adding 3 M KHCO3. The amount of acetyl-CoA was examined using a PicoProbe acetyl-CoA assay kit (Abcam), according to the manufacturer’s instructions.

**Cell Proliferation Assays**

The CCK8 assay (Dojindo, Kumamoto, Japan) was utilized to evaluate cell viability in accordance with the manufacturer's instructions. Briefly, 10 μL of CCK8 solution was added to each well, and the samples were incubated at 37°C for 2 h before the absorbance was measured at 450 nm. The cells were manually counted and replaced every other day after being plated at a density of 2×105 cells/well in a 6-well plate for the growth curve test.

**Supplementary Tables**

Supplementary Table 1. Sequences of the DNA primers used for plasmid construction.

| Name | Sequence (5’-3’) |
| --- | --- |
| pcDNA3.1(+) | Forward: CTAGAGAACCCACTGCTTAC  Reverse: TAGAAGGCACAGTCGAGG |

SupplementaryTable 2. SNHG15 Smart Silencer target sequence.

| ACGTGTTGCCTGACCATTCC |
| --- |
| GTGTCCCTGACCCAGCACAT |
| TTGCTGTGCACCAGGACCTG |
| GCAGTCTTTGTCCATGAAA |
| GCAAGCCTTGGCACCTTAA |
| GCAGCAATCCCAAGATGCT |

SupplementaryTable 3. Interfering sequences used in knockdown experiments.

| Name | Sequence (5’-3’) |
| --- | --- |
| siPDHE1α-1 | Sense: UGGAAGAACUAAAGGAAAUTT  Antisense: AUUUCCUUUAGUUCUUCCATT |
| siPDHE1α-2 | Sense: AGGUUGUGCUAAAGGGAAATT  Antisense: UUUCCCUUUAGCACAACCUTT |
| siPDK1-1 | Sense: GGACAAAAGUGCUGAGGAUTT  Antisense: AUCCUCAGCACUUUUGUCCTT |
| siPDK1-2 | Sense: UCAACAGACUCAAUAGAAATT  Antisense: UUUCUAUUGAGUCUGUUGATT |
| Scramble sequence | Sense: UUCUCCGAACGUGUCACGUTT  Antisense: ACGUGACACGUUCGGAGAATT |

SupplementaryTable 4. Sequences of the DNA primers for qRT-PCR.

| Name | Sequence (5’-3’) |
| --- | --- |
| SNHG15 | Forward: GGGGACCTGACCTGAGAGAA  Reverse: GAAGGGCAACAAGCGAGGT |
| RMRP | Forward: GGACTCTGTTCCTCCCCTTTC  Reverse: TACGCTTCTTGGCGGACTTT |
| PGK1 | Forward: GTCACTCGGGCTAAGCAGATT  Reverse: TGGCTTTCACCACCTCATCC |
| PDK1 | Forward: GCCACTATGGAACACCATGC  Reverse: CCTCATTACCCAGCGTGACA |
| PDHE1α | Forward: ACCCTGGAGTCAGTTACCGT  Reverse: GTGGGTCGCTGGAGTAGATG |
| 18S rRNA | Forward: GCTTAATTTGACTCAACACGGGA  Reverse: AGCTATCAATCTGTCAATCCTGTC |

SupplementaryTable 5. Primer sequences for the antisense SNHG15 used in the *in vitro* transcription.

| Name | Sequence (5’-3’) |
| --- | --- |
| Antisense SNHG15 | Forward: GGGACTACGCGGTGACGT  Reverse: TAATACGACTCACTATAGGGAGATTCACATATTTAAATCCAT |

**Supplementary figures**


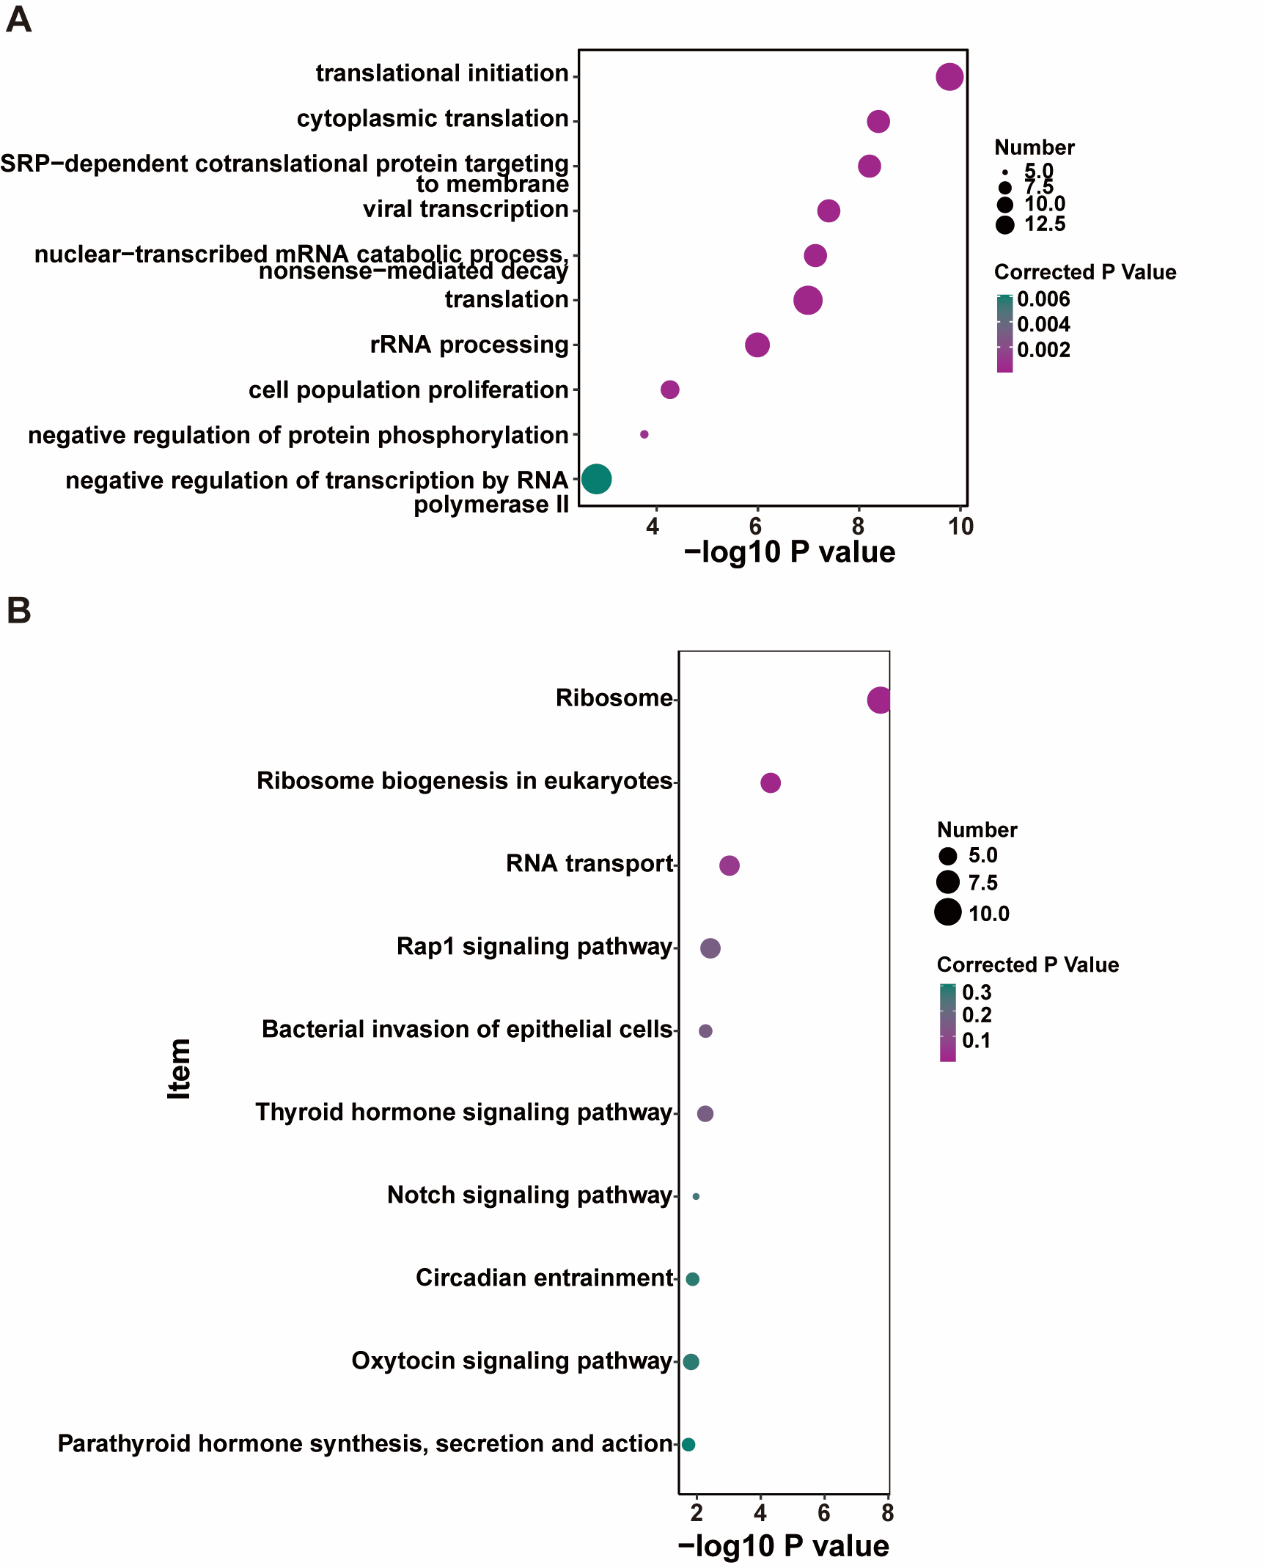


**Supplementary Fig. 1** Gene ontology (**A**) and KEGG (**B**) analysis of PDHE1α interacting RNA.


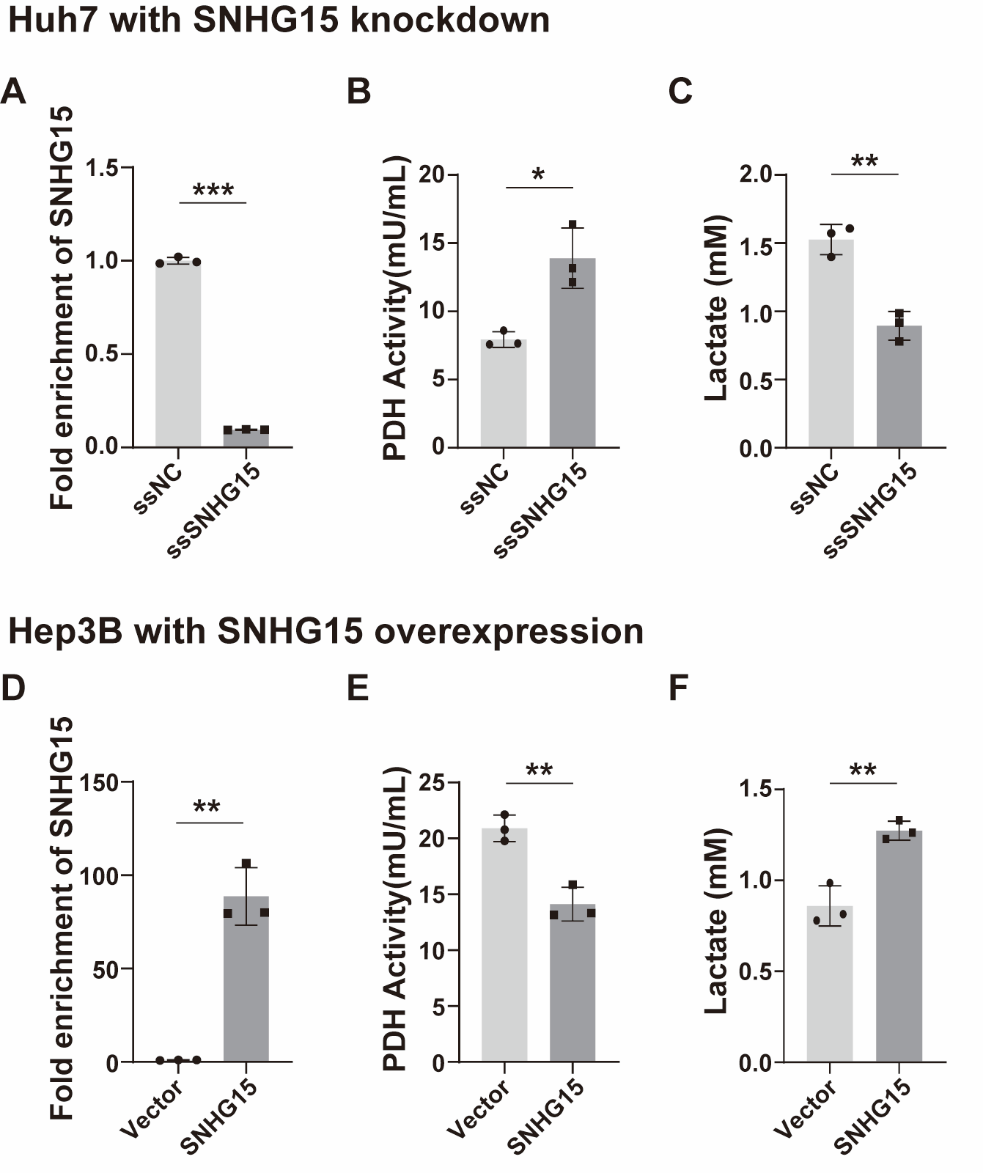


**Supplementary Fig. 2 SNHG15 dampens PDH enzymatic activity and promotes glycolysis in different HCC cell lines.** qRT-PCR analysis of SNHG15 in the Huh7 cells with SNHG15 knockdown (**A**) and Hep3B cells overexpressing SNHG15 (**D**) as compared with corresponding controls. PDH activity (**B**, **E**) and lactate production (**C**, **F**) were measured and compared with the control cells, respectively. Data represent the mean ± SD of triplicate independent analyses (**P* < 0.05, ***P* < 0.01, ****P* < 0.001, by two-sided Student’s *t*-test).

**
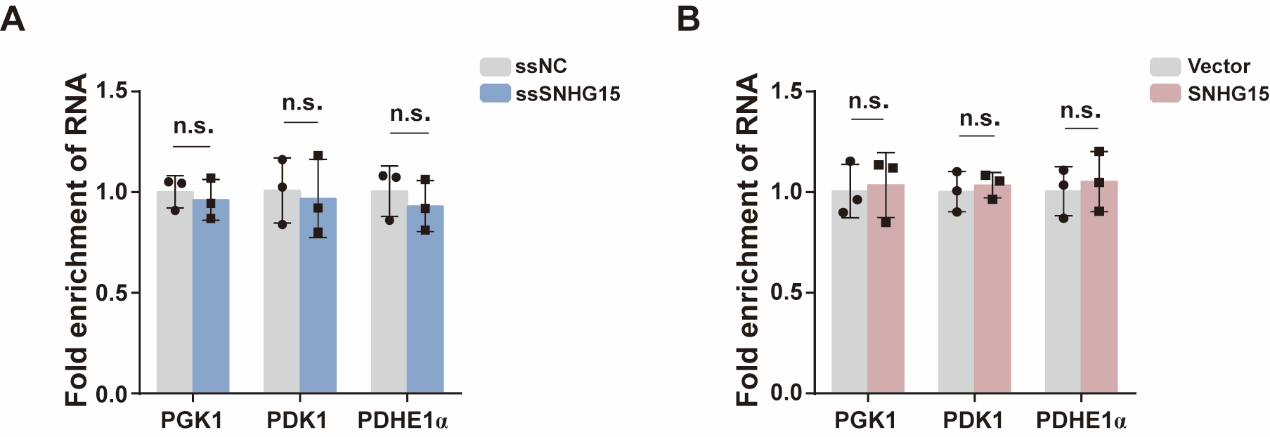
**

**Supplementary Fig. 3 The expression of SNHG15 did not affect the expression of PDHE1α at mRNA levels.** The levels of RNA with SNHG15 knockdown (**A**) or overexpression (**B**) were measured by qRT-PCR. Data represent the mean ± s.d. of triplicate independent experiments (n.s., not significant, by two-sided Student’s t test).


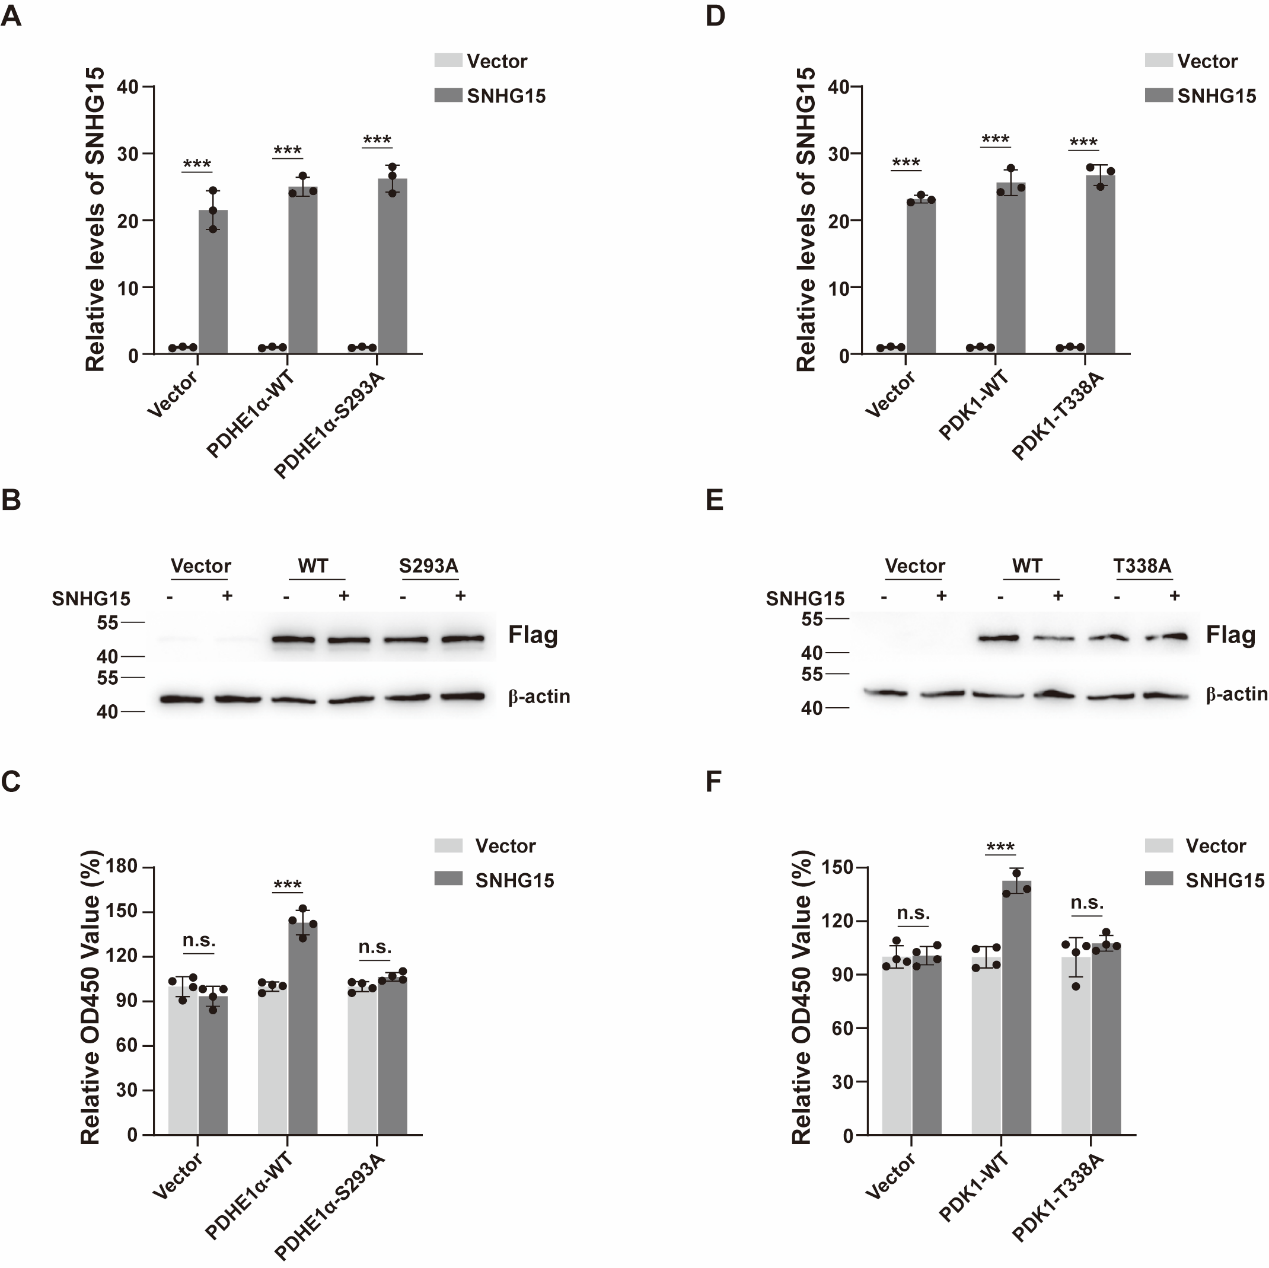


**Supplementary Fig. 4** The phosphorylation of PDK1 and PDHE1α are important for the pro-proliferation function of SNHG15. **A**, Relative levels of SNHG15 in LM3 cells transfected with vector, PDHE1α-WT and PDHE1α-S293A were measured by qRT-PCR. Data represent mean ± SD (n=3, ****P*< 0.001, by two-sided Student’s *t*-test). **B**, The expression of PDHE1α-WT or PDHE1α-S293A was measured by Western blotting using anti-Flag antibody. **C**, The proliferation of LM3 cells expressing PDHE1α-WT or PDHE1α-S293A was measured by CCK8 assay. Data represent mean ± SD of four independent experiments (****P* < 0.001, n.s., not significant, by two-sided Student’s *t*-test). **D**, Relative levels of SNHG15 in LM3 cells transfected with vector, PDK1-WT and PDK1-T338A were measured by qRT-PCR. Data represent mean ± SD (n=3, ****P* < 0.001, by two-sided Student’s *t*-test). **E**, The expression of PDK1-WT or PDK1-T338A were measured by Western blotting using anti-Flag antibody. **F**, The proliferation of LM3 cells expressing PDK1-WT or PDK1-T338A was measured by CCK8 assay. Data represent mean ± SD of four independent experiments (****P* < 0.001, n.s., not significant, by two-sided Student’s *t*-test).


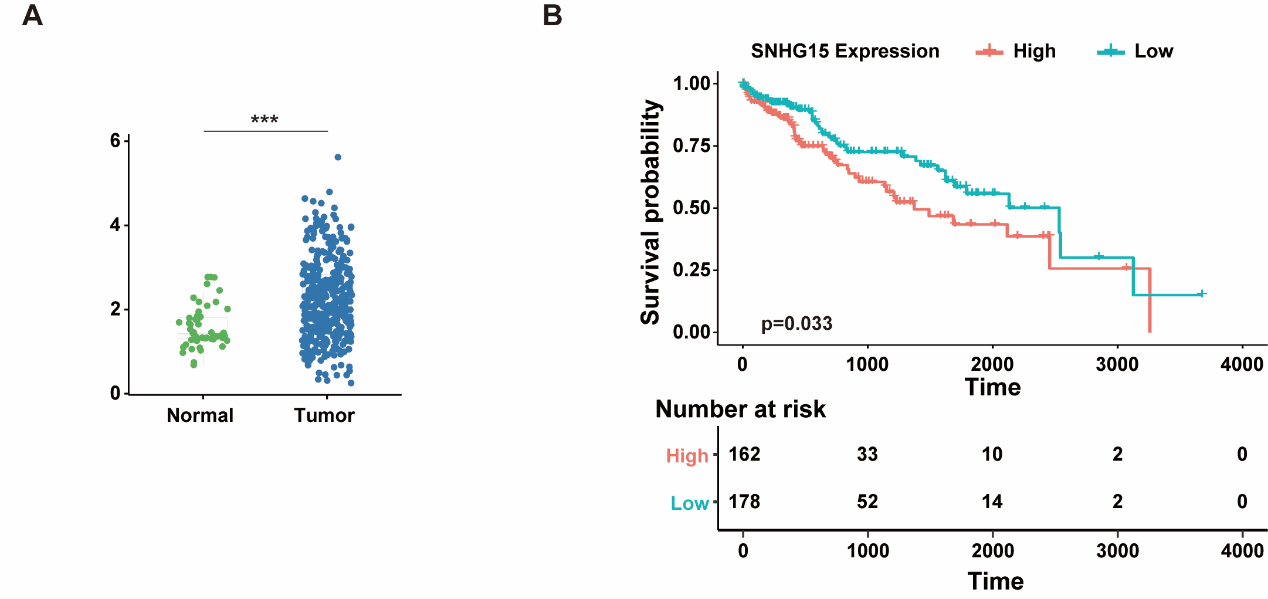


**Supplementary Fig. 5 SNHG15 expression in HCC clinical samples. A** SNHG15 expression was significantly up-regulated in HCC tumor samples (n =374) as compared with the adjacent non-tumorous tissues (n =50). The boxplots show the 25 percentile, median, 75 percentile and outliers. The data were analyzed by the two- sided Student’s *t*-test. **B** Survival rate analysis of HCC samples with differential SNHG15 expressions (High, n=207; Low, n=246). The data were downloaded from TCGA database by R package TCGAbiolinks (version:2.32.0), and the analysis was conducted by R package survival (version:3.6.4).
