# Supplementary material
Source: Research Square preprint supplement (doi:10.21203/rs.3.rs-9307919/v1)
Supplement: Supplementary file 2 [file b9ae8a80eb41333ec3944436.docx]

**Figure 4**

**Figure 5**

**Figure 7**
